# Supplementary material
Source: HighWire-hosted journal article supplement (https://thorax.bmj.com/content/72/4/327)

Supplementary Figures

**Supplemental Figure 1.**

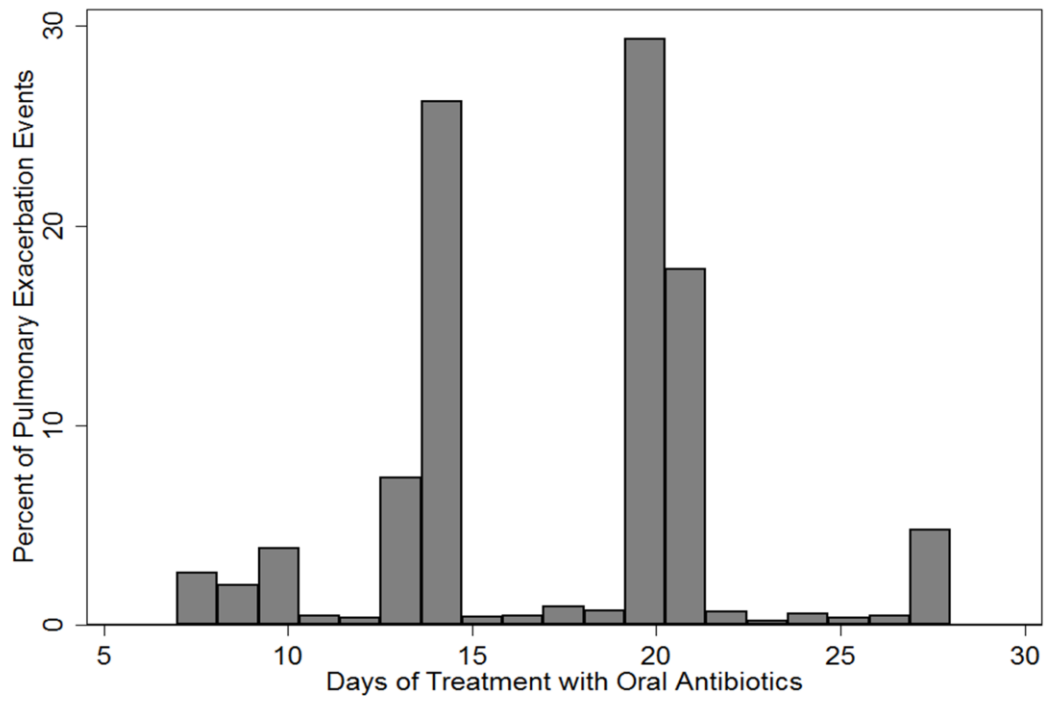

## Supplemental Figure 2.

Day 0

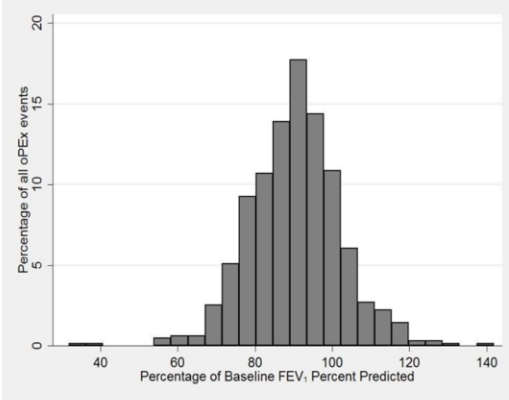

End of Treatment

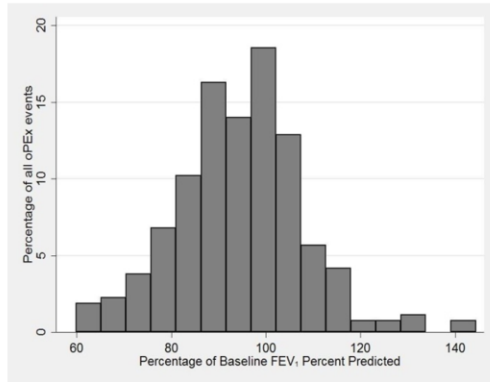

Follow Up

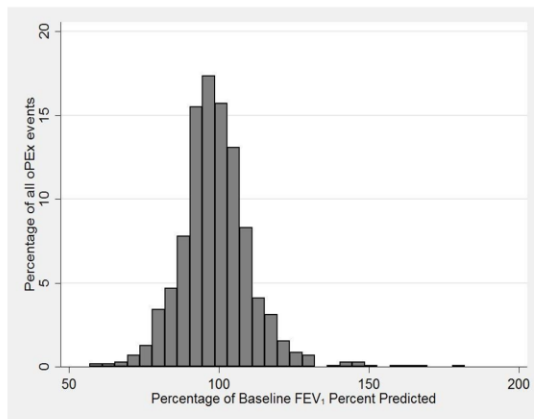

Supplemental Figure 3.

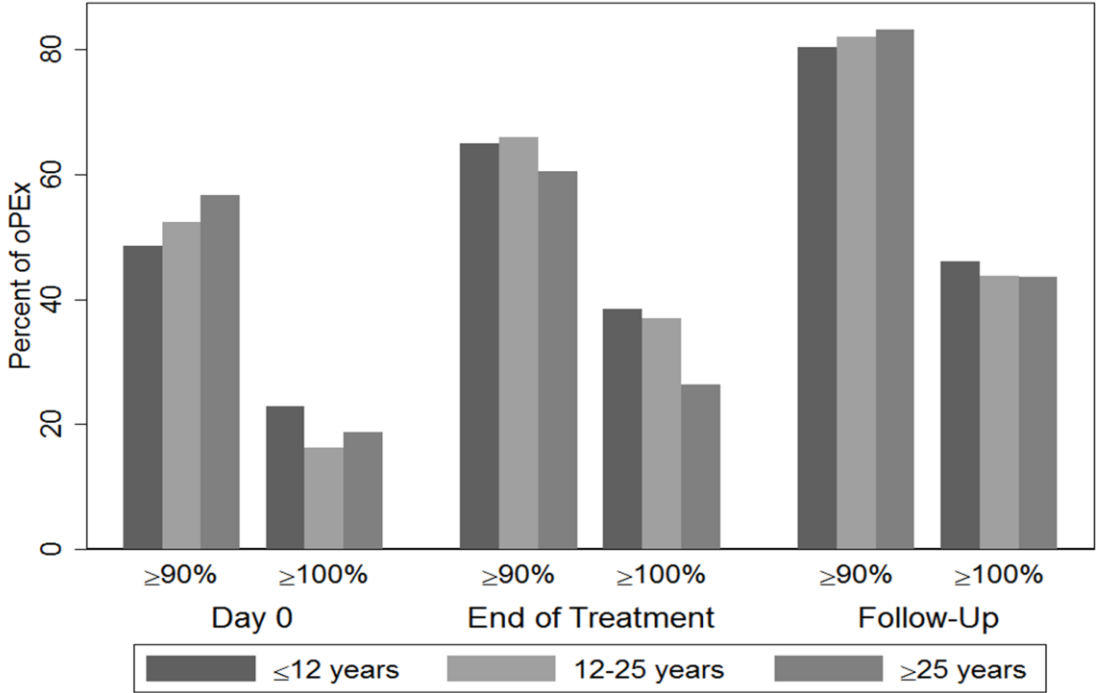

## Supplemental Figure 4.

### A. FEV<sub>1</sub> decline in Children

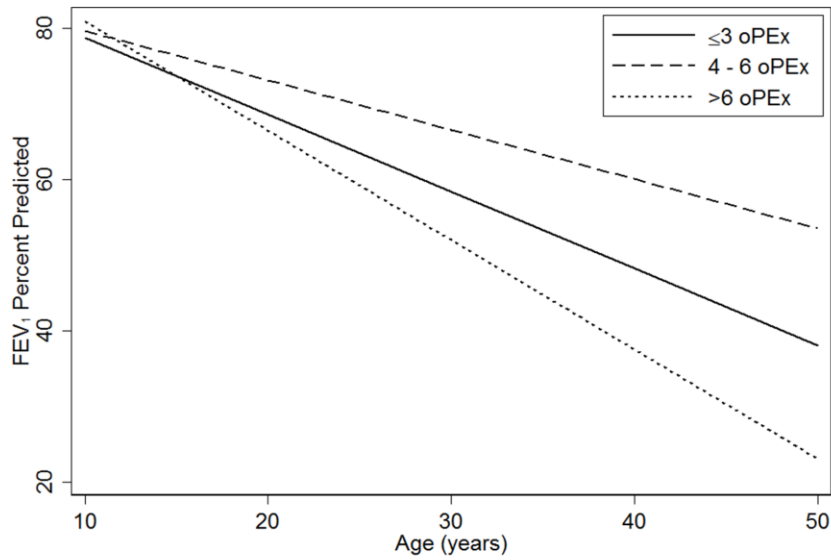

### B. FEV<sub>1</sub> decline in Adults

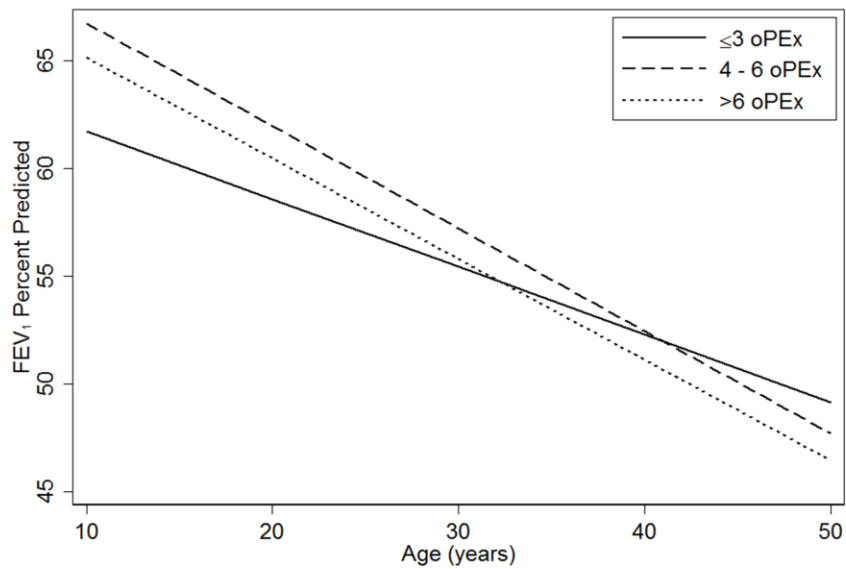

Supplement: inline-supplementary-material-1 [file inline-supplementary-material-1.pdf]
